# Supplementary material for: Nonverbal synchrony in virtual reality
Source: PubMed Central journal article supplement (PMC6746391; doi:10.1371/journal.pone.0221803), 2019-09-16

### Social Closeness Score Distribution in Collaborative Cube Condition

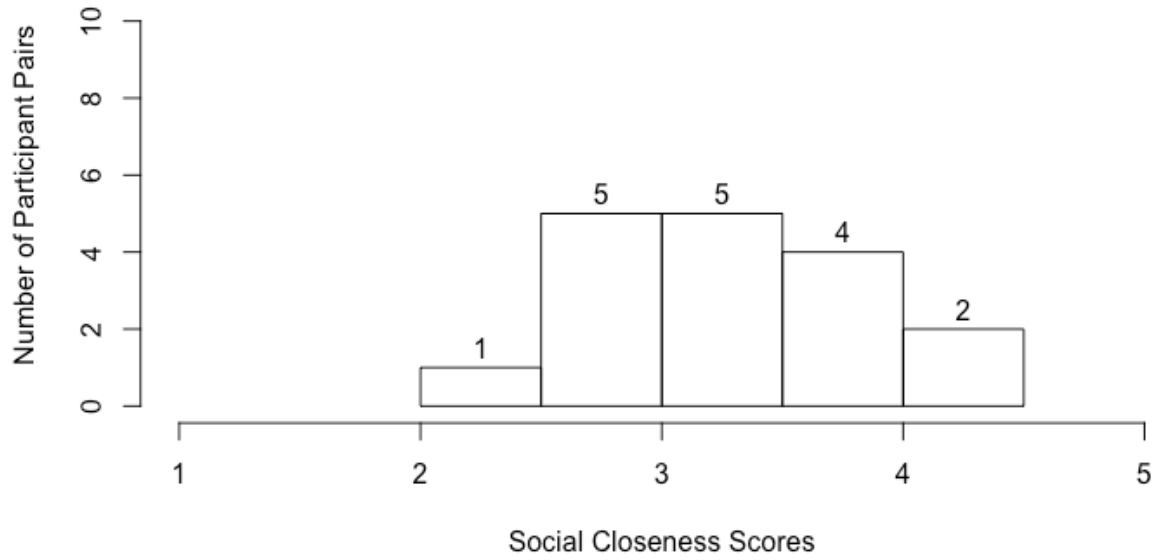

### Social Closeness Score Distribution in Collaborative Avatar Condition

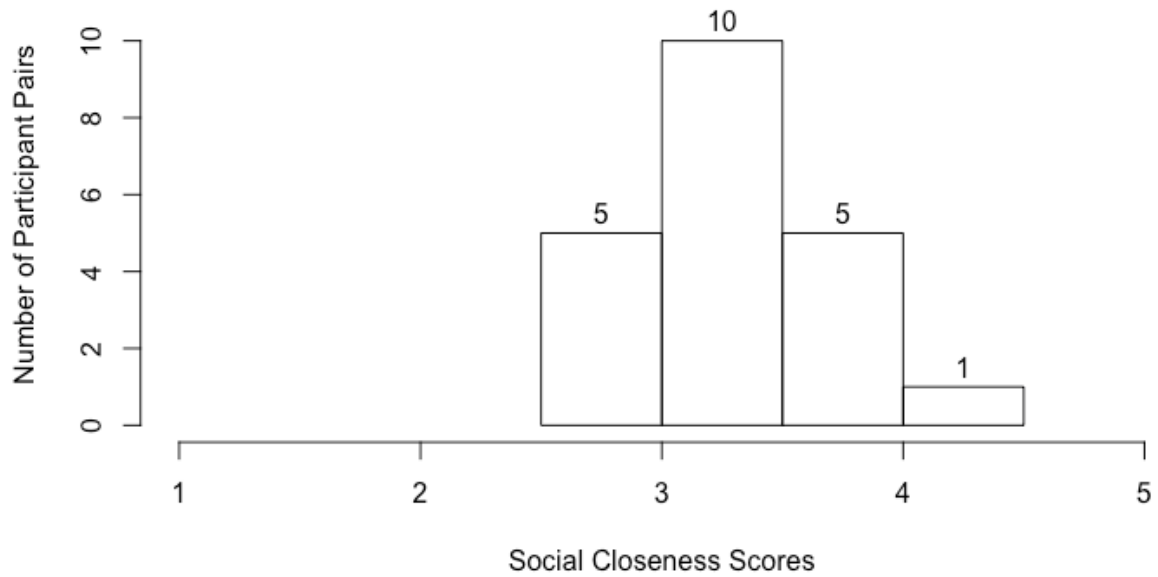

### Social Closeness Score Distribution in Competitive Cube Condition

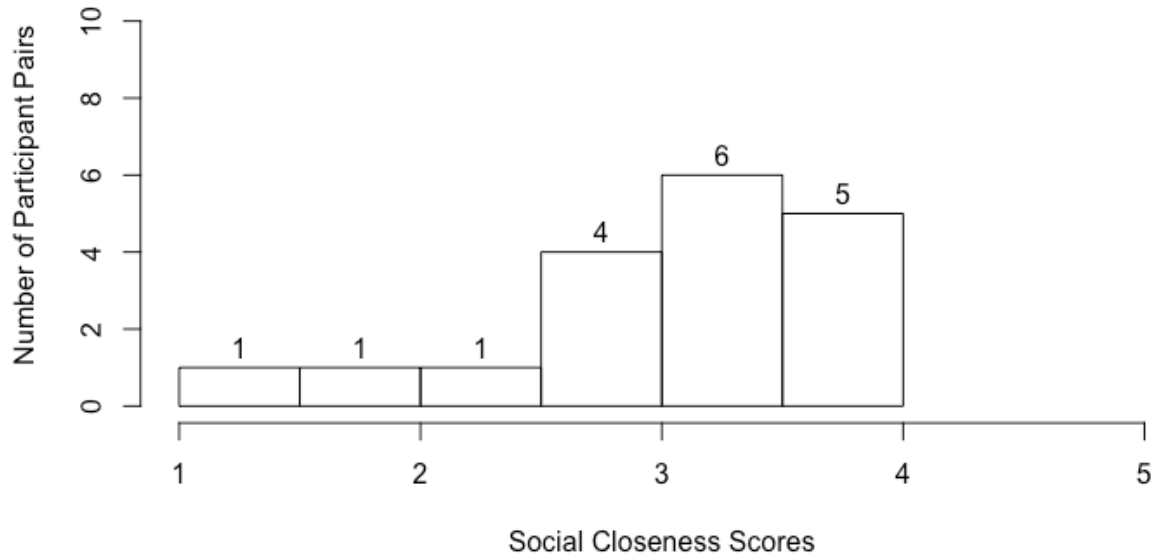

### Social Closeness Score Distribution in Competitive Avatar Condition

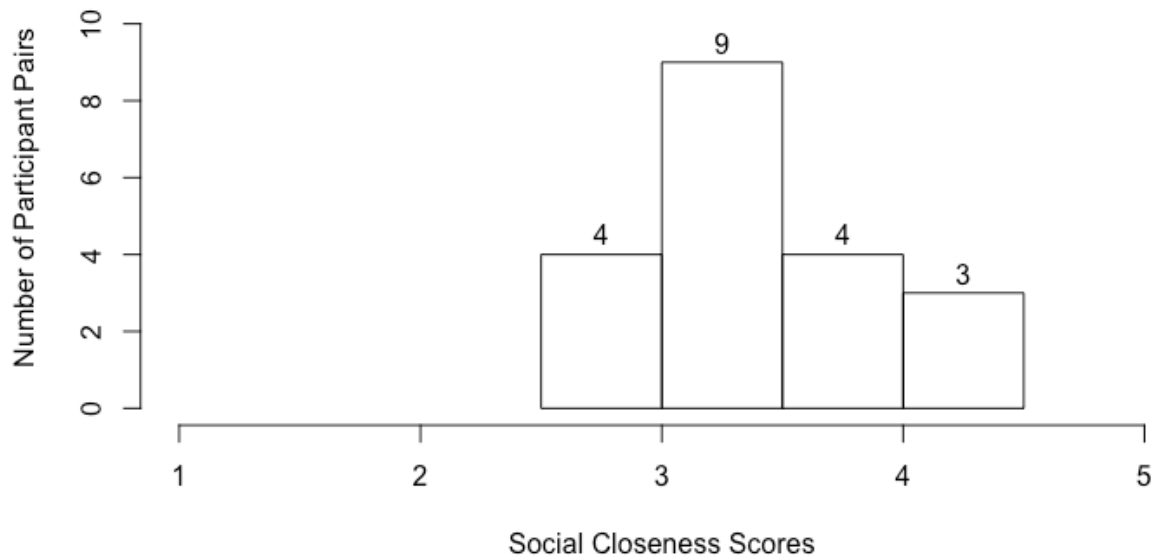

### Self-presence Score Distribution in Collaborative Avatar Condition

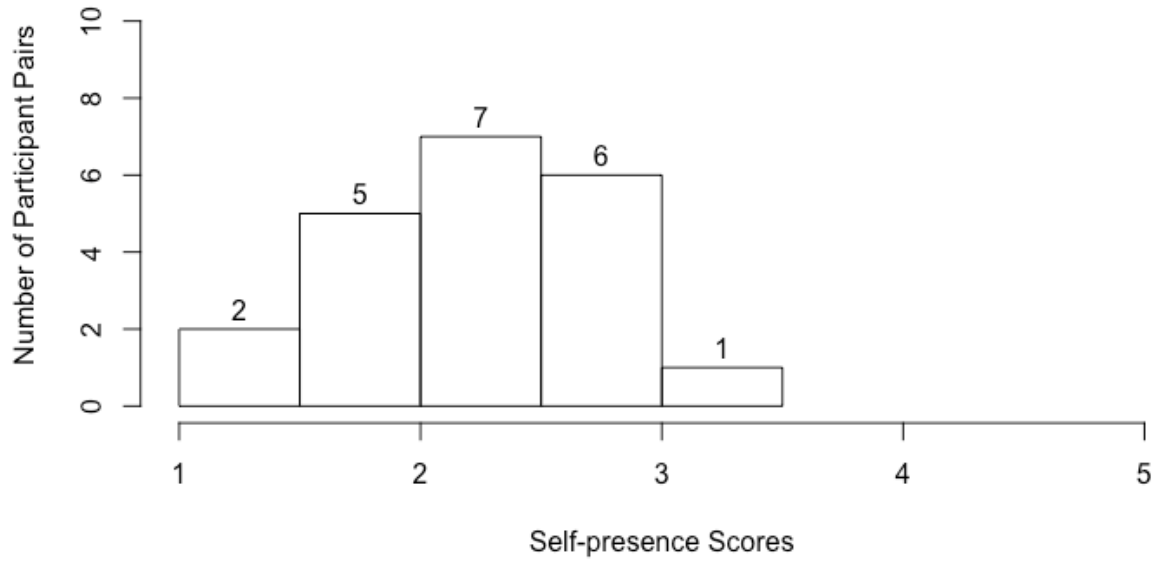

### Self-presence Score Distribution in Collaborative Cube Condition

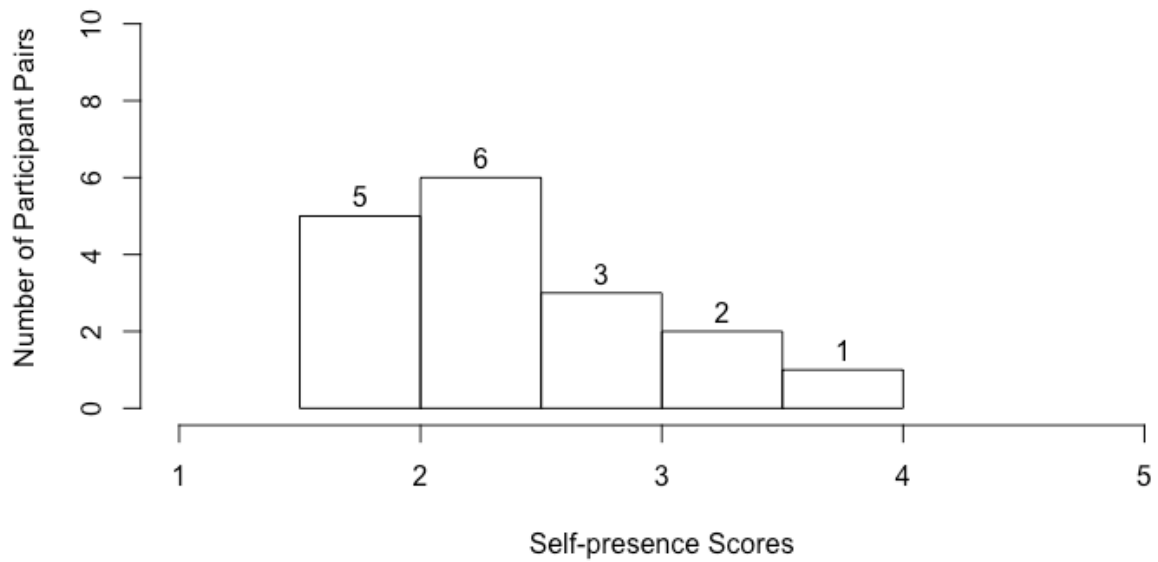

### Self-presence Score Distribution in Competitive Avatar Condition

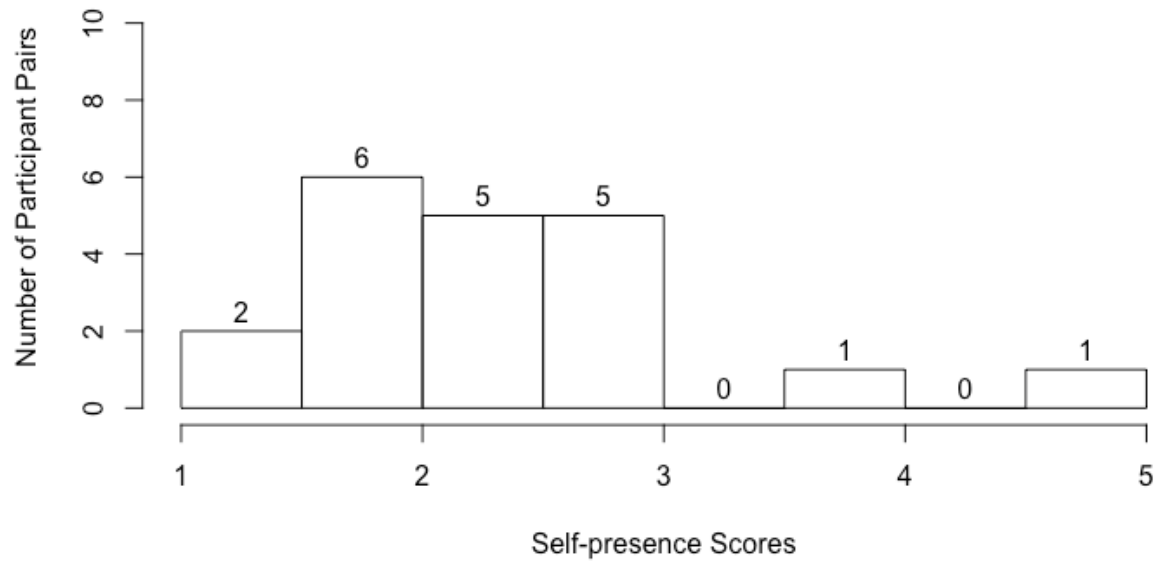

### Self-presence Score Distribution in Competitive Cube Condition

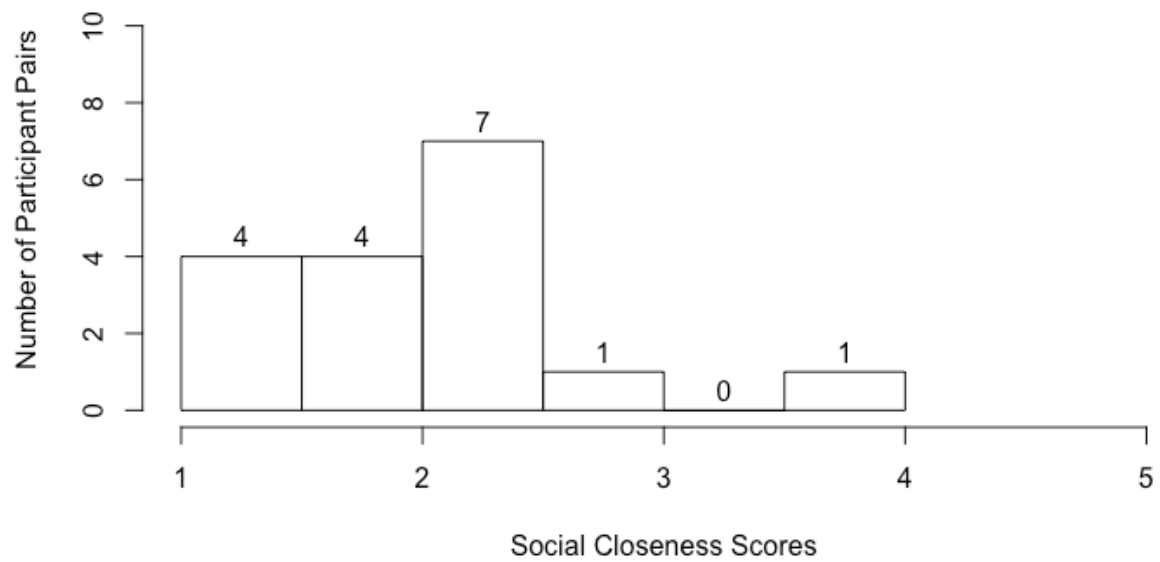

### Social Presence Score Distribution in Collaborative Avatar Condition

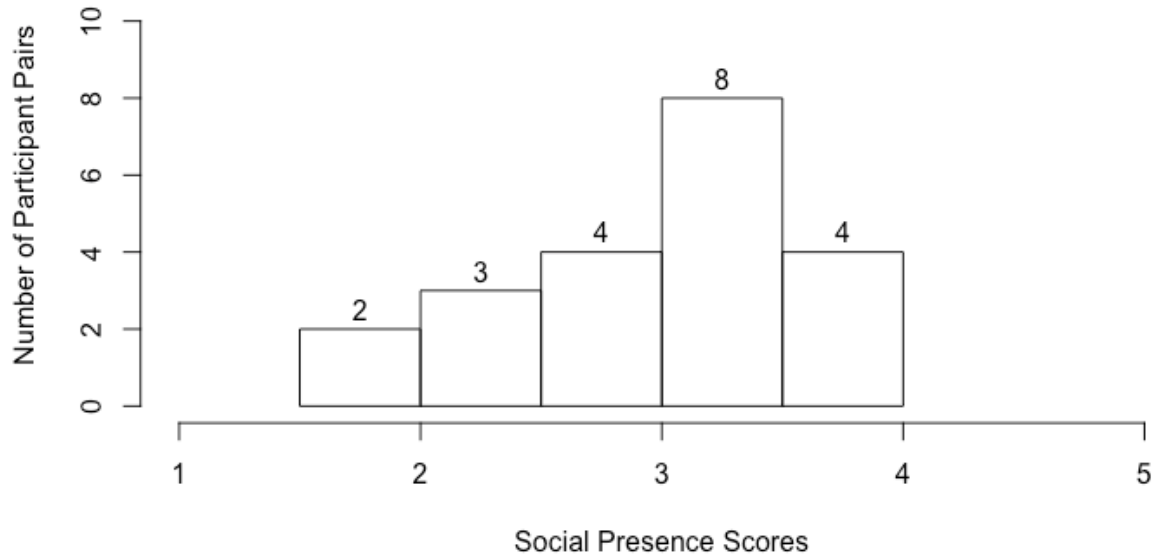

### Social Presence Score Distribution in Collaborative Cube Condition

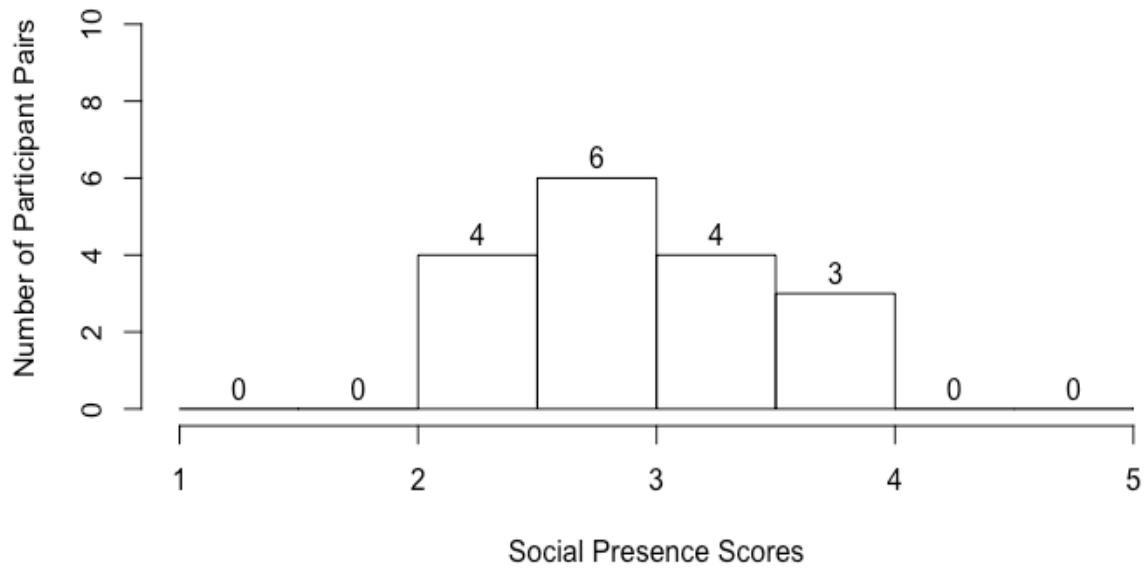

### Social Presence Score Distribution in Competitive Cube Condition

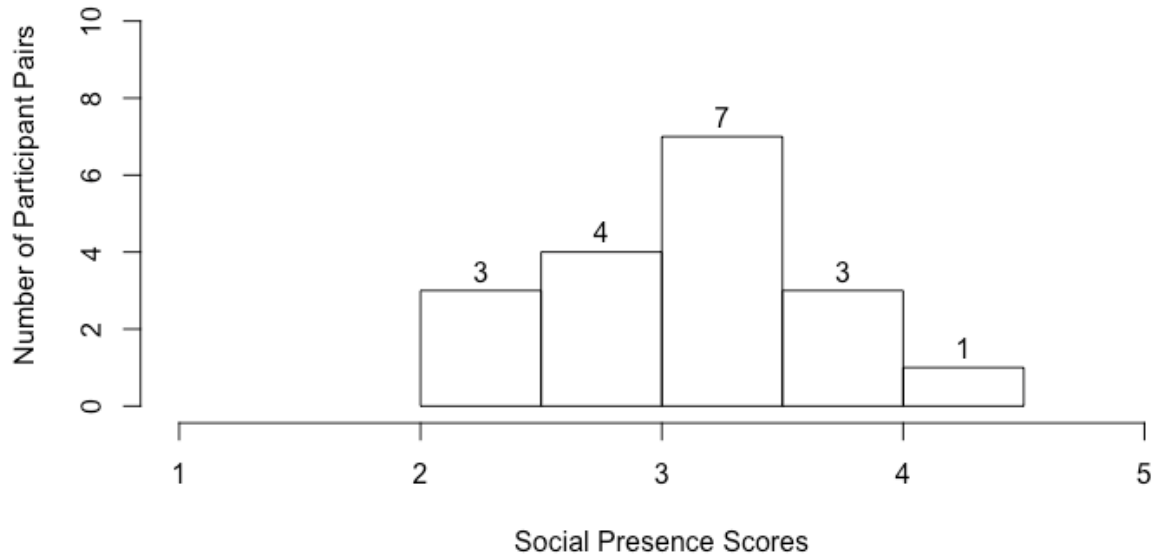

### Social Presence Score Distribution in Competitive Avatar Condition

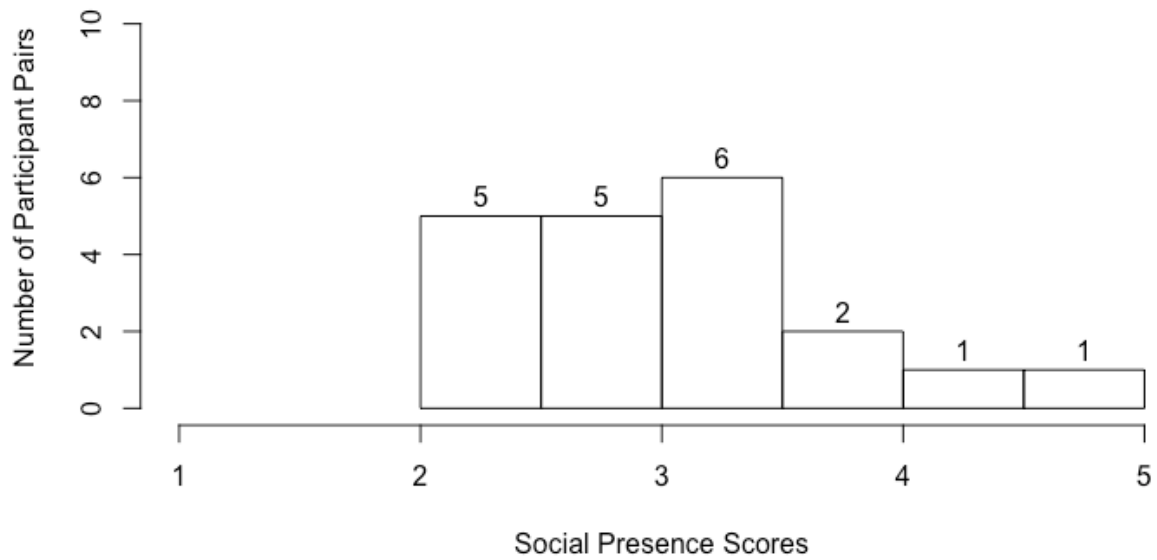

Supplement: pone.0221803.s004.pdf [file pone.0221803.s004.pdf]
