# Supplementary material for: Nonverbal synchrony in virtual reality
Source: PubMed Central journal article supplement (PMC6746391; doi:10.1371/journal.pone.0221803), 2019-09-16
Supplement: pone.0221803.s001.pdf [file pone.0221803.s001.pdf]

## Appendix A

Table 1. Summary Statistics and Wilcoxon Rank Sum Test for Four-second Summed Distance in Collaborative Condition Using Pearson R Correlation

| Body Region             | Synchrony                | Pseudosynchrony         | Wilcox.test          |
|-------------------------|--------------------------|-------------------------|----------------------|
| Head ( $n = 38$ )       | $M = 0.040, SD = 0.151$  | $M = 0.009, SD = 0.138$ | $W = 826, p = 0.284$ |
| Left Hand ( $n = 31$ )  | $M = -0.061, SD = 0.184$ | $M = 0.042, SD = 0.140$ | $W = 276, p = 0.004$ |
| Right Hand ( $n = 33$ ) | $M = -0.044, SD = 0.198$ | $M = 0.006, SD = 0.111$ | $W = 400, p = 0.065$ |
| Total ( $n = 31$ )      | $M = -0.064, SD = 0.187$ | $M = 0.023, SD = 0.130$ | $W = 308, p = 0.015$ |

Table 2. Summary Statistics and Wilcoxon Rank Sum Test for Four-second Summed Distance in Competitive Condition Using Pearson R Correlation

| Body Region             | Synchrony                | Pseudosynchrony          | Wilcox.test          |
|-------------------------|--------------------------|--------------------------|----------------------|
| Head ( $n = 38$ )       | $M = 0.035, SD = 0.196$  | $M = 0.061, SD = 0.141$  | $W = 632, p = 0.355$ |
| Left Hand ( $n = 36$ )  | $M = -0.049, SD = 0.140$ | $M = -0.013, SD = 0.121$ | $W = 506, p = 0.111$ |
| Right Hand ( $n = 35$ ) | $M = -0.063, SD = 0.197$ | $M = -0.006, SD = 0.173$ | $W = 530, p = 0.338$ |
| Total ( $n = 34$ )      | $M = -0.070, SD = 0.189$ | $M = -0.004, SD = 0.156$ | $W = 478, p = 0.224$ |

Table 3. Summary Statistics and Wilcoxon Rank Sum Test for Absolute Values of Four-second Summed Distance in Collaborative Condition Using Spearman R Correlation

| Body Region             | Synchrony               | Pseudosynchrony         | Wilcox.test          |
|-------------------------|-------------------------|-------------------------|----------------------|
| Head ( $n = 38$ )       | $M = 0.116, SD = 0.085$ | $M = 0.102, SD = 0.066$ | $W = 774, p = 0.595$ |
| Left Hand ( $n = 31$ )  | $M = 0.150, SD = 0.123$ | $M = 0.119, SD = 0.073$ | $W = 515, p = 0.635$ |
| Right Hand ( $n = 33$ ) | $M = 0.169, SD = 0.115$ | $M = 0.099, SD = 0.077$ | $W = 745, p = 0.010$ |
| Total ( $n = 31$ )      | $M = 0.164, SD = 0.125$ | $M = 0.105, SD = 0.075$ | $W = 610, p = 0.069$ |

Table 4. Summary Statistics and Wilcoxon Rank Sum Test for Absolute Values of Four-second Summed Distance in Competitive Condition Using Spearman R Correlation

| Body Region             | Synchrony               | Pseudosynchrony         | Wilcox.test            |
|-------------------------|-------------------------|-------------------------|------------------------|
| Head ( $n = 38$ )       | $M = 0.145, SD = 0.123$ | $M = 0.111, SD = 0.090$ | $W = 825.5, p = 0.285$ |
| Left Hand ( $n = 36$ )  | $M = 0.156, SD = 0.119$ | $M = 0.105, SD = 0.098$ | $W = 835, p = 0.035$   |
| Right Hand ( $n = 35$ ) | $M = 0.208, SD = 0.167$ | $M = 0.141, SD = 0.116$ | $W = 747, p = 0.116$   |
| Total ( $n = 34$ )      | $M = 0.196, SD = 0.154$ | $M = 0.128, SD = 0.112$ | $W = 736, p = 0.053$   |
