# Supplementary material for: Nonverbal synchrony in virtual reality
Source: PubMed Central journal article supplement (PMC6746391; doi:10.1371/journal.pone.0221803), 2019-09-16

**Time Differene in Timestamps for All Participants**

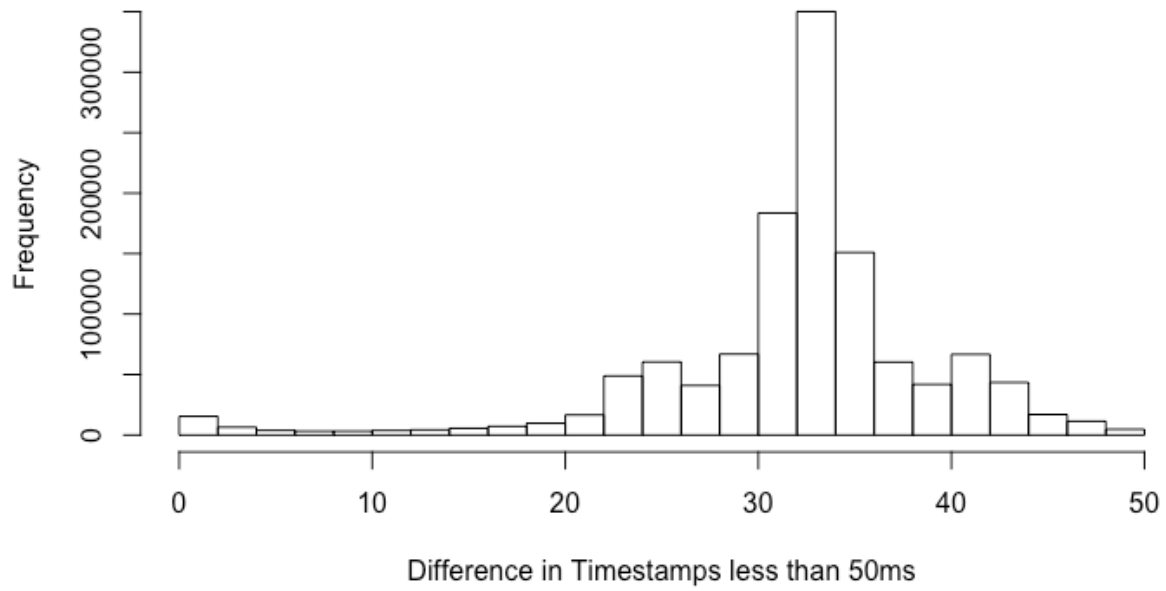

**Time Differene in Timestamps for All Participants**

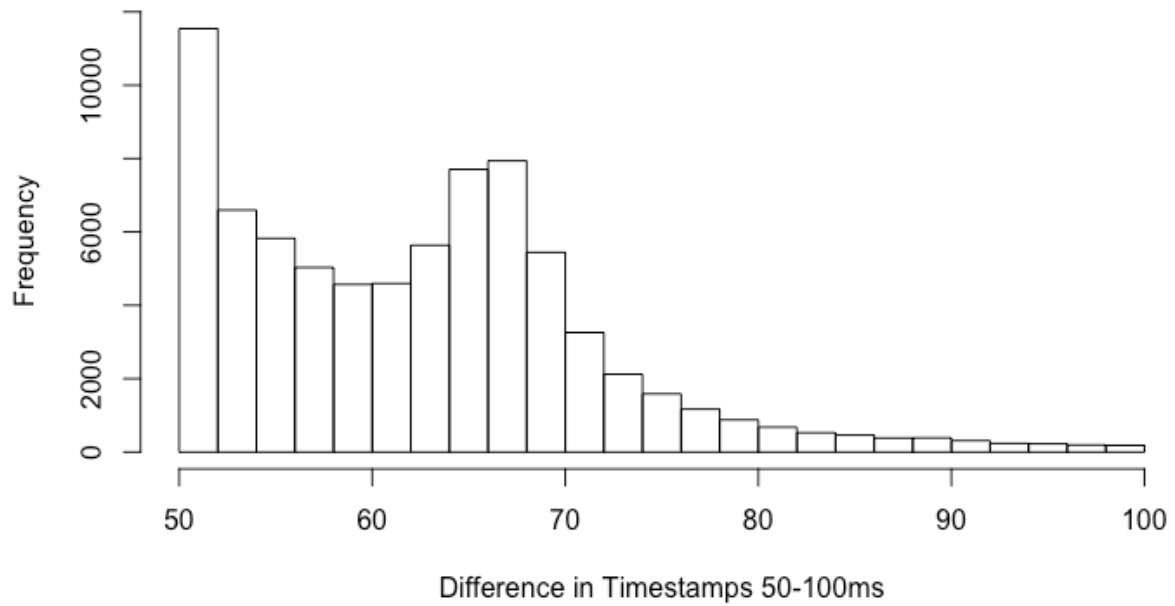

### Time Differene in Timestamps for All Participants

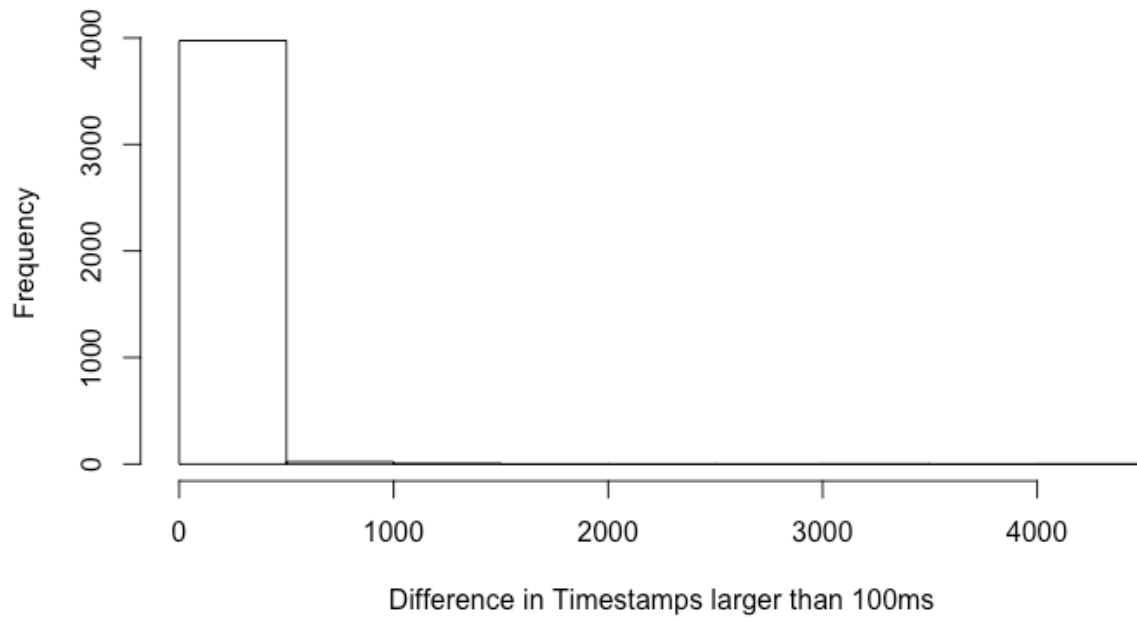

Supplement: pone.0221803.s003.pdf [file pone.0221803.s003.pdf]
